# Supplementary material for: Blood RNA-Seq profiling reveals a set of circular RNAs differentially expressed in frail individuals
Source: Immun Ageing. 2023 Jul 11;20:33. doi: 10.1186/s12979-023-00356-6 (PMC10334614; doi:10.1186/s12979-023-00356-6)
Supplement: Supplementary file 2 — Additional file 2: Supplementary Table 1. [file 12979_2023_356_MOESM2_ESM.xlsx]

## Sheet: sup Table 1
Genomic location	CircbaseID	Gene symbol	baseMean	FC	pvalue
chr6:32487146-32548633	NA	NA	20.1308	1.38813e-07	1.3332e-14
chr2:228356262-228389631	hsa_circ_0058514	AGFG1	13.1278	1.88051	0.000397604
chr8:142170730-142173528	hsa_circ_0135939	DENND3	4.1466	2.95207	0.00176972
chr8:131164981-131193126	hsa_circ_0008934	ASAP1	20.2852	1.56128	0.0023028
chr14:39648294-39648666	hsa_circ_0101802	PNN	10.633	1.82606	0.00320934
chr10:11363169-11371060	NA	NA	1.70891	6.23587	0.00360576
chr17:33390594-33393485	NA	NA	1.63236	7.07016	0.00451794
chr5:109049220-109051965	hsa_circ_0008058	MAN2A1	10.3456	0.599085	0.00478538
chr7:27668989-27672064	hsa_circ_0003958	HIBADH	2.90469	4.53923	0.004987
chr20:32619327-32621124	NA	NA	1.97302	0.172527	0.00503364
chr15:91030185-91035943	hsa_circ_0007201	IQGAP1	1.96067	0.210442	0.00575184
chr19:21587930-21588658	NA	NA	7.60001	0.479749	0.00679282
chr12:46633461-46637097	hsa_circ_0000398	SLC38A1	16.975	0.627525	0.00680041
chr8:41905895-41907225	NA	NA	3.41748	0.369136	0.00753199
chr6:111208707-111211559	hsa_circ_0005954	AMD1	7.40192	0.557601	0.00885882
chr7:35006505-35013217	hsa_circ_0134200	DPY19L1	0.998219	10.9934	0.0092838
chrX:53641494-53642796	hsa_circ_0007817	HUWE1	5.38307	1.98419	0.00986345
chr7:139746683-139757834	hsa_circ_0082688	PARP12	1.73188	0.191199	0.0103697
chr5:75737217-75758139	NA	NA	1.59432	5.48328	0.0117122
chr6:134301219-134305809	hsa_circ_0077892	TBPL1	1.63038	5.24776	0.0139693
chr2:24787163-24816590	NA	NA	4.58193	0.470402	0.0152632
chr14:71867510-71884913	NA	NA	6.40813	2.11939	0.0152729
chr3:171426544-171443866	hsa_circ_0067960	PLD1	1.51449	5.18255	0.0155607
chr10:120488806-120489922	hsa_circ_0020134	C10orf46	4.44785	2.0636	0.0161235
chr11:116734383-116744352	hsa_circ_0000357	SIK3	1.06375	7.17862	0.0162009
chr20:34309661-34313077	hsa_circ_0001148	RBM39	4.28763	0.478688	0.0166675
chr1:51926762-51930998	hsa_circ_0007330	EPS15	1.09256	0.129588	0.0177869
chr3:56694758-56707753	hsa_circ_0001315	FAM208A	16.6795	0.646112	0.0189027
chr9:99098998-99114391	hsa_circ_0087616	SLC35D2	1.33331	5.61051	0.0192066
chr1:151611363-151611595	hsa_circ_0000130	SNX27	1.64301	4.70667	0.0195994
chr12:28458581-28544344	hsa_circ_0008250	CCDC91	6.72176	0.599649	0.0209327
chr12:72163579-72167802	hsa_circ_0099178	RAB21	2.79473	2.70182	0.0213424
chr3:179096128-179109892	NA	NA	1.70848	0.245733	0.0220911
chr2:101898320-101911643	hsa_circ_0055904	RNF149	4.88832	1.94944	0.0225123
chr11:86778735-86802437	hsa_circ_0008359	TMEM135	0.870397	9.5039	0.0229072
chr19:23541231-23545527	NA	NA	21.2144	0.628968	0.023316
chr3:141231004-141259451	hsa_circ_0067582	RASA2	7.21063	1.70727	0.0234282
chr2:234296902-234307095	NA	NA	1.85261	4.03679	0.0244456
chr1:6867042-6885270	NA	NA	1.37302	0.172942	0.0247872
chr1:42730785-42744455	NA	NA	6.06489	0.578137	0.0257581
chr10:26789747-26802589	hsa_circ_0093390	APBB1IP	3.03596	2.34028	0.0258311
chr5:158699030-158702254	hsa_circ_0128457	UBLCP1	1.05235	7.20995	0.0268366
chr20:34302106-34313077	hsa_circ_0004870	RBM39	9.04138	0.649456	0.0277184
chr3:184603897-184618760	hsa_circ_0068367	VPS8	3.93322	0.47723	0.0284506
chr5:75993811-75998415	hsa_circ_0129657	IQGAP2	1.742	0.291864	0.0297793
chr5:61642956-61645947	hsa_circ_0072593	KIF2A	1.16267	0.156282	0.0305392
chr7:5680784-5692141	hsa_circ_0079284	RNF216	5.59053	1.82779	0.031223
chr4:128995614-128999117	hsa_circ_0001438	LARP1B	2.02016	3.41406	0.0314413
chr12:40696590-40697936	hsa_circ_0025887	LRRK2	9.60331	1.52271	0.0316754
chr7:23015828-23030758	hsa_circ_0005251	FAM126A	8.6917	1.61141	0.0319664
chr9:79852917-79853302	hsa_circ_0087247	VPS13A	2.11123	3.31903	0.032158
chr2:120684173-120692534	hsa_circ_0056247	PTPN4	1.53301	0.248029	0.0329437
chr7:2477438-2483381	NA	NA	6.52544	1.68155	0.0332294
chr10:5741487-5756170	NA	NA	5.58698	0.559161	0.0334242
chr15:50940883-50955243	hsa_circ_0007775	TRPM7	2.02488	3.23859	0.0334269
chr1:91403041-91447927	hsa_circ_0114428	ZNF644	1.74376	0.299186	0.0335841
chr2:136505836-136530117	hsa_circ_0117392	UBXN4	1.68977	0.273465	0.0340483
chr7:158552176-158591763	hsa_circ_0083213	ESYT2	1.09982	0.172937	0.0345025
chr7:105278799-105283568	hsa_circ_0132936	ATXN7L1	1.67242	0.256427	0.0350732
chr12:46622935-46648719	NA	NA	9.21556	0.604184	0.0354878
chr14:92264128-92268765	hsa_circ_0032969	TC2N	5.57798	0.554063	0.035717
chr7:140476711-140487384	hsa_circ_0133577	BRAF	0.774043	8.58459	0.0361483
chr1:111434013-111435155	hsa_circ_0000105	CD53	8.64922	1.65428	0.0361793
chr3:53531178-53535747	hsa_circ_0066187	CACNA1D	8.46807	1.5507	0.0375966
chr10:121275020-121286936	hsa_circ_0005516	RGS10	1.03179	0.086127	0.0386649
chr1:9991948-9995685	hsa_circ_0007803	LZIC	3.22618	2.22402	0.0389701
chr14:64465631-64489581	hsa_circ_0102377	SYNE2	3.10366	0.395252	0.0393474
chr5:102432244-102433485	hsa_circ_0006499	GIN1	9.68296	0.652699	0.0410426
chr12:89860546-89866052	hsa_circ_0027702	POC1B	4.68868	0.529301	0.0411036
chr2:55252221-55255356	hsa_circ_0054598	RTN4	2.17879	0.300283	0.0424007
chr15:59179173-59179739	hsa_circ_0000604	SLTM	1.16036	0.158458	0.0427422
chr16:31373156-31374074	hsa_circ_0039161	ITGAX	15.2358	1.72588	0.0428103
chr4:48106917-48116419	NA	NA	1.23462	0.11907	0.043268
chr12:29491463-29494749	NA	NA	2.14561	2.55951	0.0433812
chr1:100960373-100964818	hsa_circ_0013330	CDC14A	1.84908	4.4324	0.0441003
chr8:56854413-56866543	hsa_circ_0001803	LYN	3.53012	0.436152	0.0444238
chr10:31661946-31676195	NA	NA	3.73054	1.96819	0.0445168
chr6:152557241-152560841	hsa_circ_0131073	SYNE1	0.9409	6.22701	0.0454673
chr1:179955303-179966310	hsa_circ_0111362	CEP350	0.806252	0.112062	0.0459395
chr14:39746137-39748741	hsa_circ_0000530	CTAGE5	3.22366	2.21846	0.0461425
chr4:151656409-151729550	hsa_circ_0071174	LRBA	2.39195	0.417011	0.0464988
chr15:62221699-62223458	hsa_circ_0004456	VPS13C	1.40247	0.250556	0.0465892
chr6:131481198-131490413	hsa_circ_0130692	AKAP7	0.945834	6.19896	0.0467854
chr5:86627164-86633908	NA	NA	3.16276	0.379583	0.0473271
chr13:28840851-28845003	hsa_circ_0000469	PAN3	0.722932	0.123057	0.048097
chr18:9204473-9221997	hsa_circ_0003865	ANKRD12	3.31739	2.01787	0.0483916
chr5:43675612-43704502	NA	NA	6.67413	0.632379	0.049032
chr1:14099572-14109326	hsa_circ_0110664	PRDM2	3.78406	0.351502	0.0493984
chr13:77779390-77818086	hsa_circ_0030509	MYCBP2	1.16572	0.203957	0.0498798
